# Supplementary material
Source: PubMed Central journal article supplement (PMC8649039)
Supplement: ONCO-26-1052-s001.pdf [file ONCO-26-1052-s001.pdf]

Supplemental Tables for:  
 Immune Checkpoint Inhibitor-induced myositis and myocarditis with myositis/myasthenia gravis overlap syndrome: a systematic review of cases  
 Ranjan Pathak et al.

Supplementary table 1. Compliance to PRISMA Harm guidelines.

| Section/topic (page no)   | Item | PRISMA checklist item                                                                                                                                                                                                                                                                                       | PRISMA harms (minimum)                                                                      | Recommendations for reporting harms in systematic reviews (desirable)                                                                                                                                                                  | Check if done                       |
|---------------------------|------|-------------------------------------------------------------------------------------------------------------------------------------------------------------------------------------------------------------------------------------------------------------------------------------------------------------|---------------------------------------------------------------------------------------------|----------------------------------------------------------------------------------------------------------------------------------------------------------------------------------------------------------------------------------------|-------------------------------------|
| Title                     |      |                                                                                                                                                                                                                                                                                                             |                                                                                             |                                                                                                                                                                                                                                        |                                     |
| Title                     | 1    | Identify the report as a systematic review, meta-analysis, or both.                                                                                                                                                                                                                                         | Specifically mention "harms" or other related terms, or the harm of interest in the review. | —                                                                                                                                                                                                                                      | <input checked="" type="checkbox"/> |
| Abstract                  |      |                                                                                                                                                                                                                                                                                                             |                                                                                             |                                                                                                                                                                                                                                        |                                     |
| Structured summary        | 2    | Provide a structured summary including, as applicable: background; objectives; data sources; study eligibility criteria, participants, and interventions; study appraisal and synthesis methods; results; limitations; conclusions and implications of key findings; systematic review registration number. | —                                                                                           | Abstracts should report any analysis of harms undertaken in the review, if harms are a primary or secondary outcome.                                                                                                                   | <input checked="" type="checkbox"/> |
| Introduction              |      |                                                                                                                                                                                                                                                                                                             |                                                                                             |                                                                                                                                                                                                                                        |                                     |
| Rationale                 | 3    | Describe the rationale for the review in the context of what is already known.                                                                                                                                                                                                                              | —                                                                                           | It should clearly describe in introduction or in methods section which events are considered harms and provide a clear rationale for the specific harm(s), condition(s), and patient group(s) included in the review.                  | <input checked="" type="checkbox"/> |
| Objectives                | 4    | Provide an explicit statement of questions being addressed with reference to participants, interventions, comparisons, outcomes, and study design (PICOS).                                                                                                                                                  | —                                                                                           | PICOS format should be specified, although in systematic reviews of harms the selection criteria for P, C, and O may be very broad (same intervention may have been used for heterogeneous indications in a diverse range of patients) | <input checked="" type="checkbox"/> |
| Methods                   |      |                                                                                                                                                                                                                                                                                                             |                                                                                             |                                                                                                                                                                                                                                        |                                     |
| Protocol and registration | 5    | Indicate if a review protocol exists, if and where it can be accessed (e.g., web address), and, if available, provide registration information including registration number.                                                                                                                               | —                                                                                           | No specific additional information is required for systematic reviews of harms.                                                                                                                                                        | <input checked="" type="checkbox"/> |
| Eligibility criteria      | 6    | Specify study characteristics (e.g., PICOS, length of follow-up) and report characteristics (e.g., years considered, language, publication status) used as                                                                                                                                                  | —                                                                                           | Report how handled relevant studies (based on population and intervention) when the outcomes of interest were not reported.                                                                                                            | <input checked="" type="checkbox"/> |

|                                    |    |                                                                                                                                                                                                                        |                                                    |                                                                                                                                                                                                                                                                                                                                                                                                                                                                                                                                                                                        |                                     |
|------------------------------------|----|------------------------------------------------------------------------------------------------------------------------------------------------------------------------------------------------------------------------|----------------------------------------------------|----------------------------------------------------------------------------------------------------------------------------------------------------------------------------------------------------------------------------------------------------------------------------------------------------------------------------------------------------------------------------------------------------------------------------------------------------------------------------------------------------------------------------------------------------------------------------------------|-------------------------------------|
|                                    |    | criteria for eligibility, giving rationale.                                                                                                                                                                            |                                                    | Report choices for specific study designs and length of follow-up.                                                                                                                                                                                                                                                                                                                                                                                                                                                                                                                     |                                     |
| Information sources                | 7  | Describe all information sources (e.g., databases with dates of coverage, contact with study authors to identify additional studies) in the search and date last searched.                                             | —                                                  | Report if only searched for published data, or also sought data from unpublished sources, from authors, drug manufacturers and regulatory agencies. If includes unpublished data, provide the source and the process of obtaining it.                                                                                                                                                                                                                                                                                                                                                  | <input checked="" type="checkbox"/> |
| Search                             | 8  | Present full electronic search strategy for at least one database, including any limits used, such that it could be repeated.                                                                                          | —                                                  | If additional searches were used specifically to identify adverse events, authors should present the full search process so it can be replicated.                                                                                                                                                                                                                                                                                                                                                                                                                                      | <input checked="" type="checkbox"/> |
| Study selection                    | 9  | State the process for selecting studies (i.e., screening, eligibility, included in systematic review, and, if applicable, included in the meta-analysis).                                                              | —                                                  | If only included studies reporting on adverse events of interest, defined if screening was based on adverse event reporting in title/abstract or full text. If no harms reported in the text, report if any attempt was made to retrieve relevant data from authors.                                                                                                                                                                                                                                                                                                                   | <input checked="" type="checkbox"/> |
| Data collection process            | 10 | Describe method of data extraction from reports (e.g., piloted forms, independently, in duplicate) and any processes for obtaining and confirming data from investigators.                                             | —                                                  | No specific additional information is required for systematic reviews of harms.                                                                                                                                                                                                                                                                                                                                                                                                                                                                                                        | <input checked="" type="checkbox"/> |
| Data items                         | 11 | List and define all variables for which data were sought (e.g., PICOS, funding sources) and any assumptions and simplifications made.                                                                                  | —                                                  | Report the definition of the harm and seriousness used by each included study (if applicable). Report if multiple events occurred in the same individuals if this information is available. Consider if the harm may be related to factors associated with participants (e.g., age, sex, use of medications) or provider (e.g., years of practice, level of training). Specify if information was extracted and how it was used in subsequent results. Specify if extracted details regarding the specific methods used to capture harms (active/passive and timing of adverse event). | <input checked="" type="checkbox"/> |
| Risk of bias in individual studies | 12 | Describe methods used for assessing risk of bias of individual studies (including specification of whether this was done at the study or outcome level), and how this information is to be used in any data synthesis. | —                                                  | The risk of bias assessment should be considered separately for outcomes of benefit and harms.                                                                                                                                                                                                                                                                                                                                                                                                                                                                                         | <input checked="" type="checkbox"/> |
| Summary measures                   | 13 | State the principal summary measures (e.g., risk ratio, difference in means).                                                                                                                                          | —                                                  | No specific additional information is required for systematic reviews of harms.                                                                                                                                                                                                                                                                                                                                                                                                                                                                                                        | <input checked="" type="checkbox"/> |
| Synthesis of results               | 14 | Describe the methods of handling data and combining results of studies, if done, including measures of consistency (e.g., $I^2$ ) for each meta-analysis.                                                              | Specify how zero events were handled, if relevant. |                                                                                                                                                                                                                                                                                                                                                                                                                                                                                                                                                                                        | <input checked="" type="checkbox"/> |
| Risk of bias across studies        | 15 | Specify any assessment of risk of bias that may affect the cumulative evidence (e.g., publication bias, selective reporting within studies).                                                                           | —                                                  | Present the extent of missing information (studies without harms outcomes), any factors that may account for their absence, and whether these reasons may be related                                                                                                                                                                                                                                                                                                                                                                                                                   | Not relevant                        |

|                               |    |                                                                                                                                                                                                          |                                                                                                                      |                                                                                                                                                                                                                                                                                                                                          |                                     |
|-------------------------------|----|----------------------------------------------------------------------------------------------------------------------------------------------------------------------------------------------------------|----------------------------------------------------------------------------------------------------------------------|------------------------------------------------------------------------------------------------------------------------------------------------------------------------------------------------------------------------------------------------------------------------------------------------------------------------------------------|-------------------------------------|
|                               |    |                                                                                                                                                                                                          |                                                                                                                      | to the results.                                                                                                                                                                                                                                                                                                                          |                                     |
| Additional analyses           | 16 | Describe methods of additional analyses (e.g., sensitivity or subgroup analyses, meta-regression), if done, indicating which were prespecified.                                                          | —                                                                                                                    | Sensitivity analyses may be affected by different definitions, grading, and attribution of adverse events, as adverse events are typically infrequent or reported using heterogeneous classifications. Report the number of participants and studies included in each subgroup.                                                          | Not relevant                        |
| <b>Results</b>                |    |                                                                                                                                                                                                          |                                                                                                                      |                                                                                                                                                                                                                                                                                                                                          |                                     |
| Study selection               | 17 | Give numbers of studies screened, assessed for eligibility, and included in the review, with reasons for exclusions at each stage, ideally with a flow diagram.                                          | —                                                                                                                    | If a review addresses both efficacy and harms, display a flow diagram specific for each (efficacy and harm).                                                                                                                                                                                                                             | <input checked="" type="checkbox"/> |
| Study characteristics         | 18 | For each study, present characteristics for which data were extracted (e.g., study size, PICOS, follow-up period) and provide the citations.                                                             | Define each harm addressed, how it was ascertained (e.g., patient report, active search), and over what time period. | Add additional characteristics to: "P" (population) patient risk factors that were considered as possibly affecting the risk of the harm outcome. "I" (intervention) professional expertise/skills if relevant (for example if the intervention is a procedure). "T" (time) timing of all harms assessments and the length of follow-up. | <input checked="" type="checkbox"/> |
| Risk of bias within studies   | 19 | Present data on risk of bias of each study and, if available, any outcome level assessment (see item 12).                                                                                                | —                                                                                                                    | Consider the possible sources of biases that could affect the specific harm under consideration within the review. Sample selection, dropouts and measurement of adverse events should be evaluated separately from the outcomes of benefit as described in item 12, above.                                                              | <input checked="" type="checkbox"/> |
| Results of individual studies | 20 | For all outcomes considered (benefits or harms), present, for each study: (a) simple summary data for each intervention group (b) effect estimates and confidence intervals, ideally with a forest plot. | —                                                                                                                    | Report the actual numbers of adverse events in each study, separately for each intervention.                                                                                                                                                                                                                                             | Not relevant                        |
| Synthesis of results          | 21 | Present results of each meta-analysis done, including confidence intervals and measures of consistency.                                                                                                  | Describe any assessment of possible causality.                                                                       | If included data from unpublished sources, report clearly the data source and the impact of these studies to the final systematic review.                                                                                                                                                                                                | <input checked="" type="checkbox"/> |
| Risk of bias across studies   | 22 | Present results of any assessment of risk of bias across studies (see item 15).                                                                                                                          | —                                                                                                                    | No specific additional information is required for systematic reviews of harms. See item 15 above.                                                                                                                                                                                                                                       | Not relevant                        |
| Additional analysis           | 23 | Give results of additional analyses, if done (e.g., sensitivity or subgroup analyses, meta-regression (see item 16)).                                                                                    | —                                                                                                                    | No specific additional information is required for systematic reviews of harms.                                                                                                                                                                                                                                                          | Not applicable                      |
| <b>Discussion</b>             |    |                                                                                                                                                                                                          |                                                                                                                      |                                                                                                                                                                                                                                                                                                                                          |                                     |
| Summary of evidence           | 24 | Summarise the main findings including the strength of evidence for each main outcome; consider their relevance to key groups (e.g., healthcare providers, users, and policy makers).                     | —                                                                                                                    | No specific additional information is required for systematic reviews of harms.                                                                                                                                                                                                                                                          | <input checked="" type="checkbox"/> |
| Limitations                   | 25 | Discuss limitations at study and outcome level (e.g., risk of bias), and at review level (e.g., incomplete retrieval of identified research, reporting bias).                                            | —                                                                                                                    | Recognise possible limitations of meta-analysis for rare adverse events (i.e., quality and quantity of data), issues noted previously related to collection and reporting.                                                                                                                                                               | <input checked="" type="checkbox"/> |

|              |    |                                                                                                                                            |   |                                                                                                                                                                                                                   |                                     |
|--------------|----|--------------------------------------------------------------------------------------------------------------------------------------------|---|-------------------------------------------------------------------------------------------------------------------------------------------------------------------------------------------------------------------|-------------------------------------|
| Conclusions  | 26 | Provide a general interpretation of the results in the context of other evidence, and implications for future research.                    | — | State conclusions in coherence with the review findings. When adverse events were not identified we caution against the conclusion that the intervention is “safe,” when, in reality, its safety remains unknown. | <input checked="" type="checkbox"/> |
| Funding      |    |                                                                                                                                            |   |                                                                                                                                                                                                                   |                                     |
| Funding (19) | 27 | Describe sources of funding for the systematic review and other support (e.g., supply of data); role of funders for the systematic review. | — | No specific additional information is required for systematic reviews of harms.                                                                                                                                   | <input checked="" type="checkbox"/> |

Supplementary table 2. Search strategy

**MEDLINE search**

| <b>Immune checkpoint inhibitors</b>                                                                                                                                                                                                                                                                                                                                                                                                                                                                                                                                                                                                                                                                                                                           | <b>Myositis or myocarditis or myasthenia gravis</b>                                                                                                                                                                          |
|---------------------------------------------------------------------------------------------------------------------------------------------------------------------------------------------------------------------------------------------------------------------------------------------------------------------------------------------------------------------------------------------------------------------------------------------------------------------------------------------------------------------------------------------------------------------------------------------------------------------------------------------------------------------------------------------------------------------------------------------------------------|------------------------------------------------------------------------------------------------------------------------------------------------------------------------------------------------------------------------------|
| "Immunotherapy"[MeSH] OR<br>"Antibodies, Monoclonal/therapeutic use"[MeSH] OR "Programmed Cell<br>Death 1 Receptor"[MeSH] OR "programmed cell death"[ALL] OR<br>"CTLA-4 Antigen"[MeSH] OR "Ipilimumab"[TIAB]<br>OR<br>"Tremelimumab"[TIAB] OR<br>"Nivolumab"[TIAB] OR pembrolizumab [TIAB] OR<br>"Cemiplimab"[TIAB] OR "Durvalumab"[TIAB] OR<br>"Atezolizumab"[TIAB] OR<br>"Avelumab"[TIAB] OR<br>"B7-H1 Antigen"[ALL] OR<br>"CTLA-4"[ALL] OR "PDCD1 protein, human"[ALL] OR<br>"PD-1"[ALL] OR "PD-L1"[ALL] OR<br>"Checkpoint inhibitors"[ALL] OR<br>"Immune checkpoint inhibitors"[ALL] OR<br>"Immune Checkpoint Inhibitors/adverse effects"[MAJR] OR<br>"Antineoplastic Agents, Immunological/adverse effects"[MAJR] OR<br>"Neoplasms/complications"[MAJR]) | ("Myositis"[MeSH] OR<br>"Myositis/etiology*"[MeSH] OR<br>"Myositis/chemically induced"[MAJR] OR<br>"Myositis/pathology"[MeSH] OR<br>"Myocarditis"[MeSH] OR<br>"Myocarditis/etiology*"[MeSH] OR<br>"Myasthenia gravis"[MeSH]) |

**Embase search**

1. (heart.or muscle).hw.
2. (cardio\* or cardiac\* or myocard\* or pericard\* or endocard\* or heart or muscle\* or myositis or myos\* or myasthenia gravis or myasthenia\*).ti,ab,kw.
3. 1 or 2
4. ((immun\* adj3 checkpoint adj3 (inhibitor\* or modulator\* or antibod\* or block\*)) or (("cytotoxic T lymphocyte associated" adj3 "4") or "CTLA 4" or CTLA4) or (ipilimumab or "MDX CTLA 4" or Yervoy or "MDX 010" or MDX010) or (tremelimumab or ticilimumab or "CP 675 206" or "CP 675206" or CP675206) or ("Programmed Cell Death 1" or PD1 or "PD 1") or (pembrolizumab or Keytruda or Lambrolizumab or "Merck 3475" or Merck3475 or "MK 3475" or MK3475 or "Sch 900475" or Sch900475) or (nivolumab or "BMS 936558" or BMS936558 or "MDX 1106" or MDX1106 or "ONO 4538" or ONO4538 or Opdivo) or ("AMP 514" or AMP514 or MEDI0680 or "MEDI 0680") or (cemiplimab) or (sintilimab) or ("Programmed Cell Death 2" or PD2 or "PD 2") or ("programmed death ligand 1" or "PD L1" or PDL1) or (atezolizumab or Tecentriq or MPDL3280A or "MPDL 3280A") or (durvalumab or "MEDI 4736" or MEDI4736) or (avelumab or Bavencio or MSB0010718C or "MSB 0010718C") or ("BMS 936559" or BMS936559 or MDX1105 or "MDX 1105").ti,ab,kw,rn.
5. 3 and 4
6. limit 5 to yr="2010 - 2021"

Supplementary table 3. Completeness of reporting and risk of bias.

| Author, year         | Publication type | Title | Patient demographics | Current health status | Medical history | Physical examination | Patient disposition | Drug identification | Dosage          | Administration | Drug-reaction interface | Concomitant therapy | Adverse events | Discussion |
|----------------------|------------------|-------|----------------------|-----------------------|-----------------|----------------------|---------------------|---------------------|-----------------|----------------|-------------------------|---------------------|----------------|------------|
| Ang, 2021            | Publication      | Agree | Partially agree      | Agree                 | Agree           | Agree                | Agree               | Agree               | Agree           | Agree          | Agree                   | Agree               | Agree          | Agree      |
| Arangalage, 2017     | Publication      | Agree | Partially agree      | Agree                 | Disagree        | Partially agree      | Agree               | Agree               | Agree           | Agree          | Agree                   | Agree               | Agree          | Agree      |
| Arora, 2020          | Publication      | Agree | Partially agree      | Agree                 | Agree           | Agree                | Agree               | Agree               | Agree           | Agree          | Agree                   | Agree               | Agree          | Agree      |
| Behling, 2017        | Publication      | Agree | Partially agree      | Agree                 | Agree           | Agree                | Agree               | Agree               | Disagree        | Agree          | Agree                   | Agree               | Agree          | Agree      |
| Bukamur, 2019        | Publication      | Agree | Partially agree      | Agree                 | Disagree        | Partially agree      | Agree               | Agree               | Partially agree | Agree          | Agree                   | Agree               | Agree          | Agree      |
| Charles, 2019        | Publication      | Agree | Partially agree      | Agree                 | Agree           | Partially agree      | Agree               | Agree               | Agree           | Agree          | Agree                   | Agree               | Agree          | Agree      |
| Chen, 2018           | Publication      | Agree | Partially agree      | Agree                 | Disagree        | Agree                | Agree               | Agree               | Partially agree | Agree          | Disagree                | Disagree            | Agree          | Agree      |
| Chen, 2020           | Publication      | Agree | Partially agree      | Agree                 | Agree           | Agree                | Agree               | Agree               | Agree           | Agree          | Agree                   | Disagree            | Agree          | Agree      |
| Fazal, 2020          | Publication      | Agree | Partially agree      | Agree                 | Agree           | Agree                | Agree               | Agree               | Disagree        | Agree          | Partially agree         | Disagree            | Agree          | Agree      |
| Fazel, 2019          | Publication      | Agree | Partially agree      | Agree                 | Agree           | Partially agree      | Agree               | Agree               | Partially agree | Agree          | Agree                   | Disagree            | Agree          | Agree      |
| Fuentes-Antras, 2020 | Publication      | Agree | Partially agree      | Agree                 | Agree           | Partially agree      | Agree               | Agree               | Partially agree | Agree          | Agree                   | Agree               | Agree          | Agree      |
| Fukasawa, 2017       | Publication      | Agree | Partially agree      | Agree                 | Agree           | Partially agree      | Agree               | Agree               | Agree           | Agree          | Agree                   | Agree               | Agree          | Agree      |
| Hellman, 2019        | Publication      | Agree | Partially agree      | Agree                 | Agree           | Agree                | Agree               | Agree               | Agree           | Agree          | Agree                   | Disagree            | Agree          | Agree      |
| Imai, 2019           | Publication      | Agree | Partially agree      | Agree                 | Agree           | Agree                | Agree               | Agree               | Agree           | Agree          | Agree                   | Disagree            | Agree          | Agree      |
| Jayakumar, 2020      | Publication      | Agree | Partially agree      | Agree                 | Agree           | Agree                | Agree               | Agree               | Partially agree | Agree          | Agree                   | Agree               | Agree          | Agree      |
| Jeyakumar, 2020      | Publication      | Agree | Partially agree      | Agree                 | Agree           | Partially agree      | Agree               | Agree               | Agree           | Agree          | Agree                   | Disagree            | Agree          | Agree      |
| Johnson, 2016        | Publication      | Agree | Partially agree      | Agree                 | Agree           | Partially agree      | Agree               | Agree               | Agree           | Agree          | Agree                   | Disagree            | Agree          | Agree      |
| Kadota, 2019         | Publication      | Agree | Partially agree      | Agree                 | Agree           | Agree                | Agree               | Agree               | Agree           | Agree          | Agree                   | Agree               | Agree          | Agree      |
| Konstantina, 2019    | Publication      | Agree | Partially agree      | Agree                 | Partially agree | Partially agree      | Agree               | Agree               | Partially agree | Disagree       | Disagree                | Partially agree     | Agree          | Agree      |
| Liang, 2021          | Publication      | Agree | Partially agree      | Agree                 | Agree           | Partially agree      | Agree               | Agree               | Agree           | Agree          | Agree                   | Partially agree     | Agree          | Agree      |
| Lie, 2019            | Publication      | Agree | Partially agree      | Agree                 | Agree           | Agree                | Agree               | Agree               | Agree           | Agree          | Agree                   | Agree               | Agree          | Agree      |
| Lipe, 2020           | Publication      | Agree | Partially agree      | Agree                 | Partially agree | Partially agree      | Agree               | Agree               | Disagree        | Disagree       | Disagree                | Partially agree     | Agree          | Agree      |
| Liu, 2020            | Publication      | Agree | Partially agree      | Agree                 | Disagree        | Partially agree      | Agree               | Agree               | Agree           | Agree          | Agree                   | Agree               | Agree          | Agree      |
| Martinez-Calle, 2018 | Publication      | Agree | Partially agree      | Agree                 | Agree           | Agree                | Agree               | Agree               | Agree           | Agree          | Agree                   | Agree               | Agree          | Agree      |
| Matsui, 2020         | Publication      | Agree | Partially agree      | Agree                 | Agree           | Agree                | Agree               | Agree               | Agree           | Agree          | Agree                   | Agree               | Agree          | Agree      |
| Mehta, 2016          | Publication      | Agree | Partially agree      | Disagree              | Agree           | Agree                | Disagree            | Agree               | Disagree        | Disagree       | Disagree                | Partially agree     | Disagree       | Agree      |



Supplementary Table 4. Summary of adverse events and immunosuppressive therapies used.

| Author, year     | Age | Sex | Indication     | ICI                          | Immune-related adverse events              | Type of steroid     | IV or oral | Dose                                  | Adjunctive therapies                                             | Upfront or later use of adjunctive therapies |
|------------------|-----|-----|----------------|------------------------------|--------------------------------------------|---------------------|------------|---------------------------------------|------------------------------------------------------------------|----------------------------------------------|
| Ang, 2021        | 74  | F   | Melanoma       | Anti-PD-L1 (agent unclear)   | Myocarditis + myositis                     | Methyl prednisolone | IV         | 2 mg/kg/day                           | Mycophenolate mofetil                                            | -                                            |
| Arangalage, 2017 | 35  | F   | Melanoma       | Nivolumab plus ipilimumab    | Myocarditis + myositis                     | Methyl prednisolone | IV         | 1 g/day                               | Tacrolimus                                                       | Later                                        |
| Arora, 2020      | 70  | M   | Melanoma       | Nivolumab plus ipilimumab    | Myocarditis + myositis + myasthenia gravis | Methyl prednisolone | IV         | 1 mg/kg/day increased to 1 g/day      | Anti-thymocyte globulin, mycophenolate mofetil, cyclophosphamide | Later                                        |
| Arora, 2020      | 79  | M   | Melanoma       | Pembrolizumab                | Myocarditis + myositis                     | Methyl prednisolone | IV         | 1 mg/kg/day and increased to 1 g/day  | Anti-thymocyte globulin, mycophenolate mofetil; cyclophosphamide | Later (cyclophosphamide given on 3rd day)    |
| Arora, 2020      | 61  | F   | Breast cancer  | Durvalumab plus tremelimumab | Myocarditis + myositis                     | Methyl prednisolone | IV         | 2 mg/kg/day                           | Mycophenolate mofetil                                            | Later                                        |
| Arora, 2020      | 69  | M   | Bladder cancer | Pembrolizumab                | Myocarditis + myositis                     | Methyl prednisolone | IV         | 1 mg/kg/day increased to 1 g/day      | Mycophenolate mofetil                                            | Upfront                                      |
| Arora, 2020      | 67  | F   | Melanoma       | Nivolumab plus ipilimumab    | Myocarditis + myositis + myasthenia gravis | Methyl prednisolone | IV         | 2 mg/kg/day then increased to 1 g/day | PLEX, anti-thymocyte globulin,                                   | Later                                        |
| Arora, 2020      | 83  | M   | Melanoma       | Nivolumab                    | Myocarditis + myositis                     | Methyl prednisolone | IV         | 1 mg/kg/day                           | PLEX                                                             | Upfront                                      |
| Arora, 2020      | 89  | M   | Lung           | Pembrolizumab                | Myocarditis + myositis                     | Methyl              | IV         | 1 mg/kg/day                           | -                                                                | -                                            |



|                      |    |   |                    |                           |                                            |                     |    |                                                                          |                                     |                                                 |
|----------------------|----|---|--------------------|---------------------------|--------------------------------------------|---------------------|----|--------------------------------------------------------------------------|-------------------------------------|-------------------------------------------------|
|                      |    |   | cancer             |                           |                                            | prednisolone        |    |                                                                          |                                     |                                                 |
| Behling, 2017        | 63 | M | Melanoma (uveal)   | Nivolumab                 | Myocarditis + myositis                     | Methyl prednisolone | IV | 1.5 mg/kg/day                                                            | -                                   | -                                               |
| Bukamur, 2019        | 88 | F | Lung cancer        | Nivolumab                 | Myocarditis + myositis                     | Methyl prednisolone | IV | High dose pulse steroid                                                  | -                                   | -                                               |
| Charles, 2019        | 33 | M | Hodgkin's lymphoma | Nivolumab                 | Myocarditis + myositis                     | Methyl prednisolone | IV | 1-2 mg/kg/day                                                            | Mycophenolate mofetil and IVIG      | Later                                           |
| Chen, 2018           | 43 | M | Thymoma            | Nivolumab                 | Myocarditis + myositis                     | Methyl prednisolone | IV | 1000 mg/day for 3 days followed by 500 mg/day for 4 days, then 60 mg/day | IVIG                                | Upfront                                         |
| Chen, 2020           | 69 | F | Lung Cancer        | Camrelizumab              | Myocarditis + myositis                     | Methyl prednisolone | IV | 240 mg/day                                                               | -                                   | -                                               |
| Fazal, 2020          | 82 | M | Melanoma           | Nivolumab                 | Myocarditis + myositis                     | Methyl prednisolone | IV | 1 g/day and dual antiplatelets                                           | IVIG at 0.4 g/kg per day for 5 days | -                                               |
| Fazel, 2019          | 78 | F | Melanoma           | Nivolumab plus ipilimumab | Myocarditis + myositis                     | Methyl prednisolone | IV | 1 mg/kg/day                                                              | IVIG, PLEX                          | Later (IVIG after 5 days and PLEX after 1 week) |
| Fuentes-Antras, 2020 | 75 | M | Lung cancer        | Pembrolizumab             | Myocarditis + myositis + myasthenia gravis | Methyl prednisolone | IV | 1 g/day                                                                  | IVIG and infliximab                 | Later (after 2 days)                            |
| Fukasawa, 2017       | 69 | F | Lung Cancer        | Nivolumab                 | Myocarditis + myasthenia gravis            | Methyl prednisolone | IV | 1,000 mg for 3 days followed by 1 mg/kg/day                              | -                                   | -                                               |

|                   |    |   |                |                                  |                                            |                                      |      |                                 |                                                      |                      |
|-------------------|----|---|----------------|----------------------------------|--------------------------------------------|--------------------------------------|------|---------------------------------|------------------------------------------------------|----------------------|
| Hellman, 2019     | 84 | M | Bladder cancer | Pembrolizumab (with epacadostat) | Myocarditis + myositis                     | Prednisone                           | oral | 1 mg/kg/day                     | IV methyl prednisone                                 | Later (after 9 days) |
| Imai, 2019        | 70 | M | Lung cancer    | Pembrolizumab                    | Myocarditis + myositis                     | Methyl prednisolone                  | IV   | 1 g/day                         | IVIg                                                 | Later (after 3 days) |
| Jeyakumar, 2020   | 86 | M | Cutaneous SCC  | Cemiplimab                       | Myocarditis + myositis + myasthenia gravis | Methyl prednisolone                  | IV   | 1 g/day                         | Plasma exchange therapy for 5 days, one dose of IVIg | -                    |
| Johnson, 2016     | 65 | F | Melanoma       | Nivolumab plus ipilimumab        | Myocarditis + myositis                     | Methyl prednisolone                  | IV   | 2 mg/kg/day                     | -                                                    | -                    |
| Johnson, 2016     | 63 | M | Melanoma       | Nivolumab plus ipilimumab        | Myocarditis + myositis                     | -                                    | -    | 1 g daily                       | Infliximab                                           | -                    |
| Kadota, 2019      | 78 | M | Melanoma       | Pembrolizumab                    | Myocarditis + myositis                     | -                                    | -    | -                               | -                                                    | -                    |
| Kadota, 2019      | 80 | M | Melanoma       | Nivolumab                        | Myocarditis + myositis + myasthenia gravis | -                                    | -    | -                               | -                                                    | -                    |
| Kadota, 2019      | 63 | M | Melanoma       | Nivolumab                        | Myocarditis + myositis                     | -                                    | -    | -                               | -                                                    | -                    |
| Kadota, 2019      | 65 | F | Melanoma       | Nivolumab plus ipilimumab        | Myocarditis + myositis                     | -                                    | -    | -                               | -                                                    | -                    |
| Kadota, 2019      | 63 | M | Melanoma       | Nivolumab plus ipilimumab        | Myocarditis + myositis                     | -                                    | -    | -                               | -                                                    | -                    |
| Konstantina, 2019 | 58 | F | Thymoma        | Pembrolizumab                    | Myocarditis + myasthenia gravis            | Prednisolone                         | -    | 1 mg/kg/day                     | Mycophenolate mofetil                                | -                    |
| Konstantina, 2019 | 30 | F | Thymoma        | Pembrolizumab                    | Myocarditis + myasthenia gravis            | Prednisolone                         | -    | 2 mg/kg/day                     | Rituximab                                            | -                    |
| Liang, 2021       | 77 | M | Chordoma       | Sintilimab and anlotinib.        | Myocarditis + myasthenia gravis            | Methyl prednisolone and prednisolone | IV   | 160 mg every 8 hours for 5 days | -                                                    | -                    |
| Lie, 2019         | 79 | M | Mesothelio     | Nivolumab                        | Myocarditis + myositis                     | Methyl                               | IV   | 1000 mg/day                     | Mycophenolate mofetil                                | Later                |

| ma                   |    |   |                        | prednisolone              |                                            |                     |    |                |                       | (mycophenolate mofetil after 8 days) |
|----------------------|----|---|------------------------|---------------------------|--------------------------------------------|---------------------|----|----------------|-----------------------|--------------------------------------|
| Lipe, 2020           | 49 | F | Thymoma                | Pembrolizumab             | Myocarditis + myositis + myasthenia gravis | -                   | -  | -              | -                     | -                                    |
| Lipe, 2020           | 67 | M | Lung SCC               | Durvalumab                | Myocarditis + myositis + myasthenia gravis | -                   | -  | -              | -                     | -                                    |
| Lipe, 2020           | 77 | M | Urinary bladder Cancer | Pembrolizumab             | Myocarditis + myositis + myasthenia gravis | -                   | -  | -              | -                     | -                                    |
| Lipe, 2020           | 81 | F | Renal Cell Carcinoma   | Nivolumab and Ipilimumab  | Myocarditis + myositis + myasthenia gravis | -                   | -  | -              | -                     | -                                    |
| Lipe, 2020           | 75 | M | Chondroma              | Pembrolizumab             | Myocarditis + myositis + myasthenia gravis | -                   | -  | -              | -                     | -                                    |
| Lipe, 2020           | 66 | F | Renal cell Cancer      | Nivolumab plus Ipilimumab | Myocarditis + myositis + myasthenia gravis | -                   | -  | -              | -                     | -                                    |
| Lipe, 2020           | 74 | F | Melanoma               | Nivolumab plus Ipilimumab | Myocarditis + myositis + myasthenia gravis | -                   | -  | -              | -                     | -                                    |
| Liu, 2020            | 71 | M | Melanoma               | Nivolumab                 | Myocarditis + myositis                     | Methyl prednisolone | IV | 1 g/day        | IVIg and methotrexate | Later (after 9 days)                 |
| Martinez-Calle, 2018 | 67 | F | Multiple myeloma       | Pembrolizumab             | Myocarditis + myositis                     | Methyl prednisolone | IV | 1.5 mg/kg/day  | Infliximab            | Later (after 2 days)                 |
| Matsui, 2020         | 69 | M | Bladder cancer         | Pembrolizumab             | Myocarditis + myositis                     | Methyl prednisolone | IV | 15 mg/day/body | -                     | -                                    |
| Mehta, 2016          | 79 | M | Lung Cancer            | Nivolumab                 | Myocarditis + myositis                     | -                   | -  | -              | -                     | -                                    |
| Monge, 2018          | 79 | M | Prostate               | Nivolumab                 | Myocarditis + myositis                     | Methyl              | IV | 1 mg/kg/day    | -                     | -                                    |

|               |    |   | cancer                 |                           |                                            | prednisolone            |    |                                                |                                                                                 |                                                                                                                                  |
|---------------|----|---|------------------------|---------------------------|--------------------------------------------|-------------------------|----|------------------------------------------------|---------------------------------------------------------------------------------|----------------------------------------------------------------------------------------------------------------------------------|
| Nasr, 2018    | 79 | M | Gastric adenocarcinoma | Pembrolizumab             | Myocarditis + myositis                     | Methyl prednisolone     | IV | 1 mg/kg/day                                    | IVIG, methotrexate                                                              | Later (IVIG 2 mg/kg IV for 4 days and methotrexate 25 mg/m2 subcutaneously once weekly after 5 days when cardiac symptoms arose) |
| Rota, 2019    | 71 | M | Renal cancer           | Nivolumab                 | Myocarditis + myositis + myasthenia gravis | Methyl prednisolone     | IV | 1 g/kg/day                                     | IVIG                                                                            | Upfront                                                                                                                          |
| Saibil, 2019  | 67 | M | Melanoma               | Nivolumab plus ipilimumab | Myocarditis + myositis                     | Methyl prednisolone     |    | 200 mg on day 1, then 1000 mg daily for 3 days | Infliximab, IVIG                                                                | Later (1 dose of infliximab (5 mg/kg) and 2 doses of intravenous IVIG 3 days later)                                              |
| Sessums, 2020 | 74 | M | Bladder cancer         | Atezolizumab              | Myocarditis + myositis                     | Methyl prednisolone     | IV | 1g daily                                       | -                                                                               | -                                                                                                                                |
| Shah, 2019    | 73 | M | Bladder cancer         | Nivolumab plus ipilimumab | Myocarditis + myositis                     | Methyl prednisolone     | IV | 1 mg/kg twice daily                            | Infliximab infusion followed by 12 rounds of PLEX and subsequent IVIG infusions | Later                                                                                                                            |
| Shirai, 2018  | 83 | M | Melanoma               | Pembrolizumab             | Myocarditis + myositis + myasthenia gravis | Methyl prednisolone and | IV | 3 days of steroid pulse therapy (methyl        | Four cycles of PLEX therapy were carried out simultaneously                     | -                                                                                                                                |

|                               |    |   |                   |                              |                                               |                        |    |                                                                                                                                                 |                               |   |
|-------------------------------|----|---|-------------------|------------------------------|-----------------------------------------------|------------------------|----|-------------------------------------------------------------------------------------------------------------------------------------------------|-------------------------------|---|
|                               |    |   |                   |                              |                                               | prednisolone           |    | prednisolone)<br>1000 mg/d<br>followed by<br>prednisolone at<br>a dose of 1<br>mg/kg/day,<br>which were<br>gradually<br>tapered to 30<br>mg/day | with steroid pulse<br>therapy |   |
| So, 2019                      | 55 | F | Melanoma          | Nivolumab                    | Myocarditis + myositis +<br>myasthenia gravis | Methyl<br>prednisolone | IV | -                                                                                                                                               | IVIG, PLEX                    | - |
| Swali, 2020                   | 77 | M | Melanoma          | Pembrolizumab                | Myocarditis + myositis                        | Methyl<br>prednisolone |    | 1 g/day                                                                                                                                         | IVIG                          | - |
| Szuchan,<br>2019              | 70 | F | Thymic<br>Cancer  | Pembrolizumab                | Myocarditis + myasthenia<br>gravis            | Methyl<br>prednisolone | IV | 1 g/day                                                                                                                                         | -                             | - |
| Todo, 2020                    | 63 | M | Bladder<br>cancer | Pembrolizumab                | Myocarditis + myositis                        | Methyl<br>prednisolone | -  | 1 mg/kg/day                                                                                                                                     | -                             | - |
| Tomoaia,<br>2020              | 63 | F | Lung<br>cancer    | Nivolumab                    | Myocarditis + myositis                        | Methyl<br>prednisolone | -  | -                                                                                                                                               | -                             | - |
| Valenti-<br>Azcarate,<br>2019 | 66 | M | Lung<br>cancer    | Nivolumab plus<br>Ipilimumab | Myocarditis + myositis                        | Methyl<br>prednisolone | IV | 2 mg/kg/day                                                                                                                                     | -                             | - |
| Veccia, 2016                  | 65 | M | Lung              | Nivolumab                    | Myocarditis + myositis                        | Dexamethason           | IV | 8 mg/day twice                                                                                                                                  | IVIG 0.4 mg/kg/day            | - |

|                |    |   |                   |                           |                                            |                     |      |             |  |                                                                                                                                   |                                               |
|----------------|----|---|-------------------|---------------------------|--------------------------------------------|---------------------|------|-------------|--|-----------------------------------------------------------------------------------------------------------------------------------|-----------------------------------------------|
|                |    |   | cancer            |                           |                                            | e                   |      | daily       |  | administered for 5 days.<br>Oral pyridostigmine (60 mg daily) followed for one week. Oral prednisone 1mg/kg daily was maintained. |                                               |
| Nivolumab plus |    |   |                   |                           |                                            |                     |      |             |  |                                                                                                                                   |                                               |
| Witham, 2017   | 74 | M | Melanoma          | Ipilimumab                | Myocarditis + myositis                     | -                   | oral | -           |  | IVIG                                                                                                                              | -                                             |
| Xing, 2017     | 66 | M | Lung cancer       | Sintilimab                | Myocarditis + myositis + myasthenia gravis | Methyl prednisolone | IV   | 2 mg/kg/day |  | IVIG 400 mg/kg/day for 5 days<br>Pyridostigmine bromide (120 mg, twice a day)<br>Antibiotic therapy, nutrition support<br>PLEX    | Later (PLEX was given 5 weeks after steroids) |
| Yanase, 2020   | 59 | M | Renal Cell cancer | Nivolumab plus Ipilimumab | Myocarditis + myositis + myasthenia gravis | Methyl prednisolone | IV   | 1000 mg/day |  | IVIG                                                                                                                              | -                                             |

F=female; IV=intravenous; IVIG=Intravenous immunoglobulins; M=male; PLEX=plasmapheresis
